# Supplementary material
Source: Royal Society of Chemistry journal article supplement (doi:10.1039/d6an00437g)
Supplement: d6an00437g1.pdf [file d6an00437g1.pdf]

## Barcoding for Isobaric Tagging of Carboxylic Acids and Amines Metabolites

Briana M. Tengan, Michael R. Armbruster, Julius Agongo, Christopher K. Arnatt, and James L. Edwards

Department of Chemistry and Biochemistry, Saint Louis University, Saint Louis, Missouri

### Contents:

Figure S1: HRMS spectra of barcode acid tags injected separately.

Figure S2: NMR spectra of barcode acid tags.

Figure S3: HRMS spectra of barcode amine tags injected separately.

Figure S4: NMR spectra of barcode amine tags.

Figure S5: Collusion energy Optimization of barcode tags.

Figure S6: Minimal deuterium shifts consistent with reporter intensity.

Figure S7: Signal intensities of CoA

Figure S8: Log<sub>2</sub> fold change of metabolites quantified

Figure S9: Level one confirmation of metabolites

Figure S10: Growth curve of Wild-type and PanC *E. coli*

Table 1: Analytical performance

Table 2: HMDB IDs of metabolites and Log<sub>2</sub> fold change

Table 3: Ratio of reporter ions to cyclized products

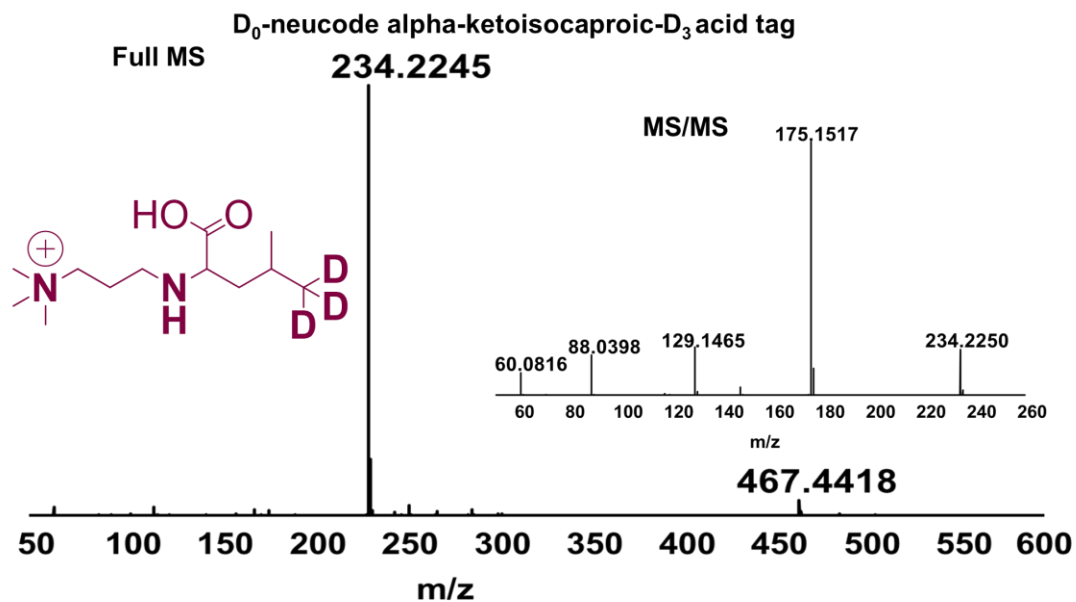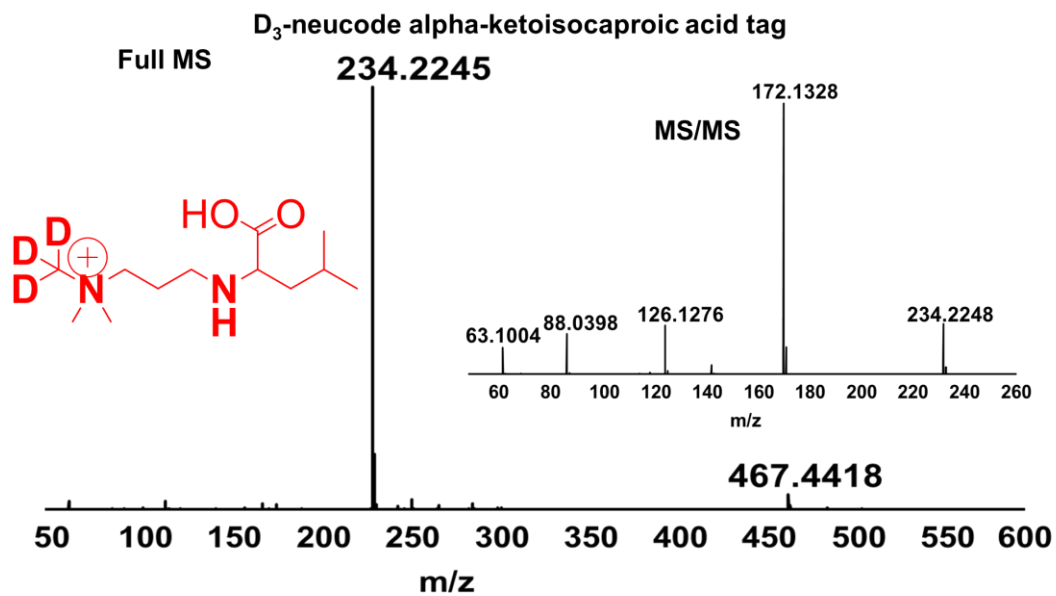

**Figure S1:** HRMS spectra of D<sub>0</sub>-neucode alpha-ketoisocaproic-D<sub>3</sub> and D<sub>3</sub>-neucode alpha-ketoisocaproic acid tags in separate injections. Each tag was characterized by HRMS at a resolution of R = 140K via direct injection.

### D<sub>0</sub>-neucode alpha-ketoisocaproic-D<sub>3</sub> acid tag

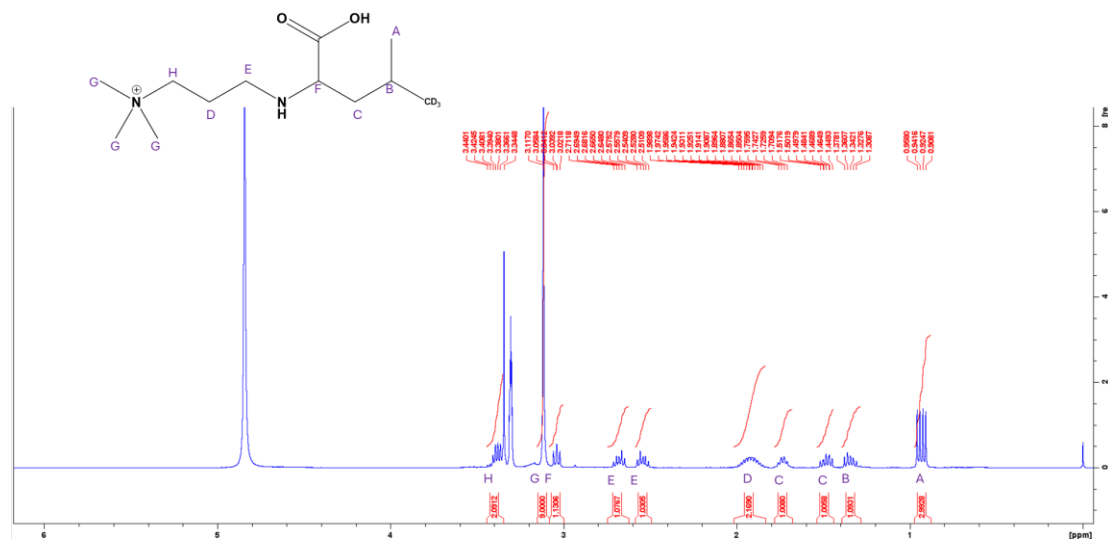

### D<sub>3</sub>-neucode alpha-ketoisocaproic acid tag

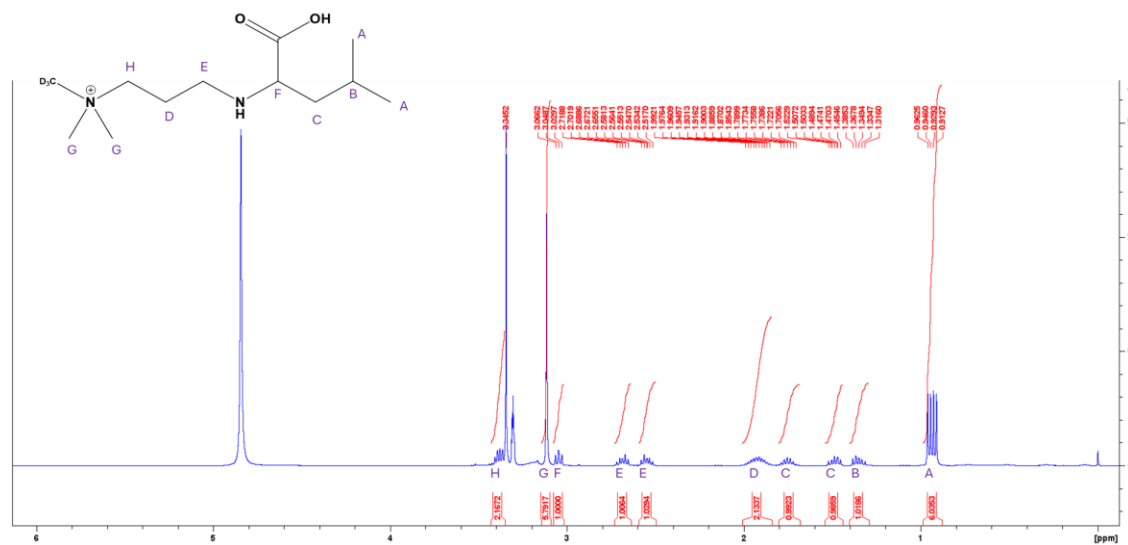

**Figure S2:** NMR spectra of D<sub>0</sub>-neucode alpha-ketoisocaproic-D<sub>3</sub> and D<sub>3</sub>-neucode alpha-ketoisocaproic acid tags.

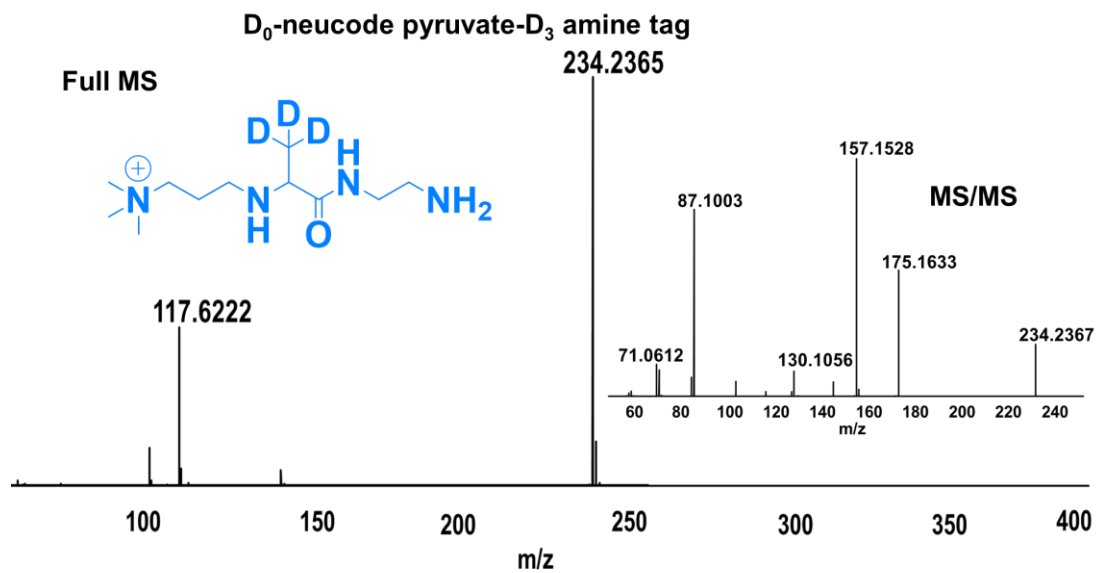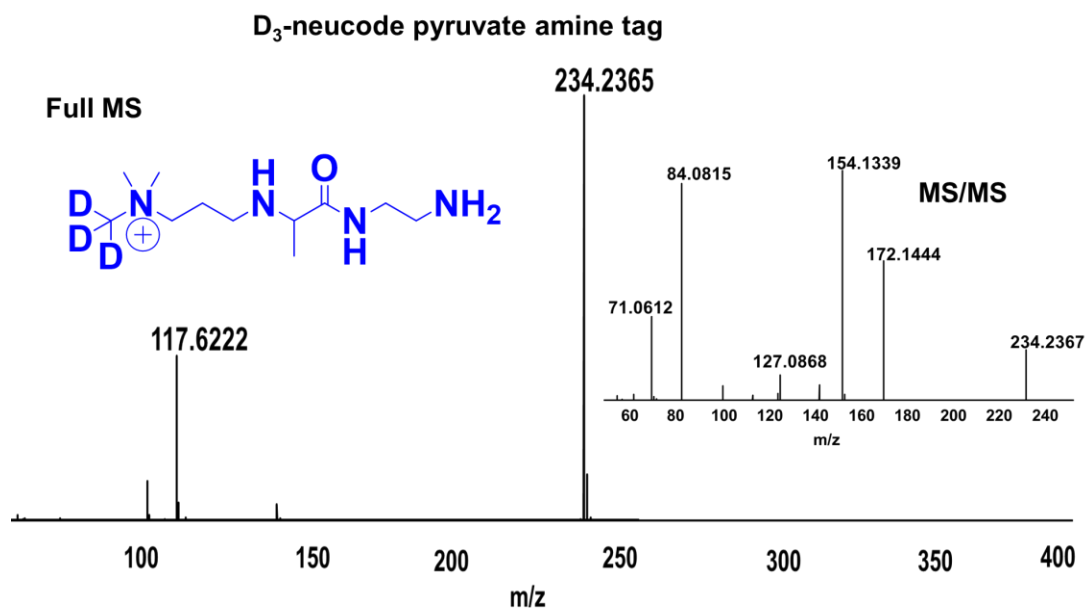

**Figure S3:** HRMS spectra of D<sub>0</sub>-neucode pyruvate-D<sub>3</sub> and D<sub>3</sub>-neucode pyruvate amine tags in separate injections. Each tag was characterized by HRMS at a resolution of R = 140K via direct injection.



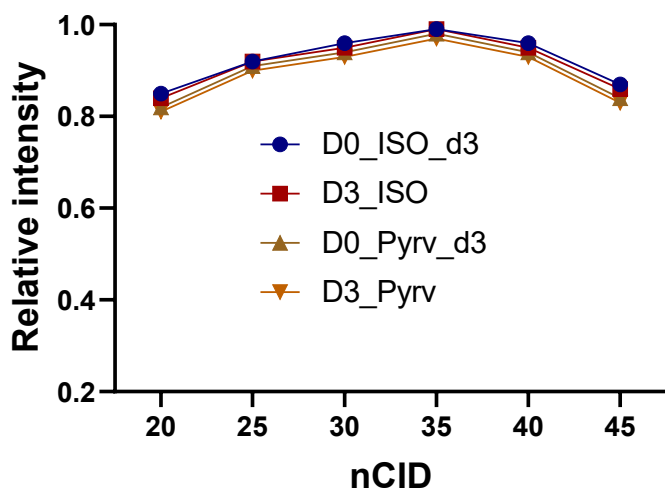

**Figure S5:** Optimizing collision energy fragmentation for both amine and acid tag variants. Tags are characterized at different collision energies to identify the nCID that generated high reporter ion intensity.

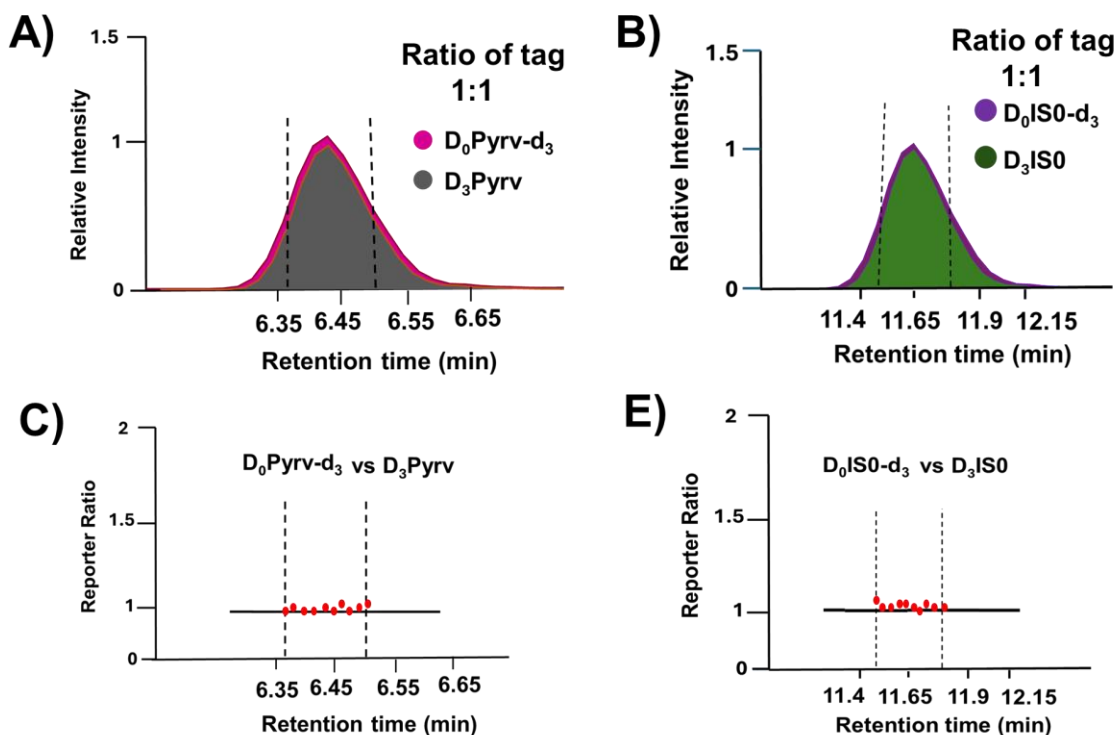

**Figure S6:** Minimal deuterium shifts are observed across each acid and amine tag variant peak (A, B). The lack of deuterium shifts results in consistent reporter intensity across the top 50% of each peak, shown with dotted points (C, D).

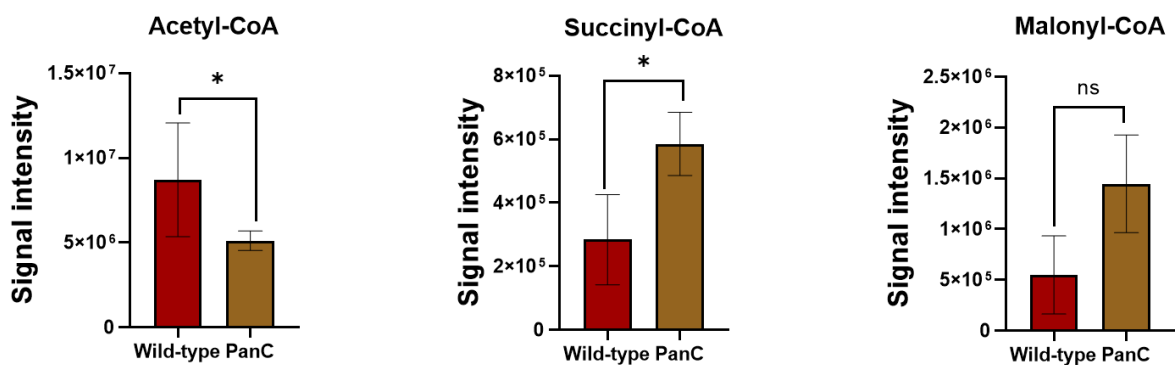

**Figure S7:** Signal intensities of acetyl-CoA, succinyl-CoA, and malonyl-CoA in Wild-type and PanC *E. coli*. Each *E. coli* strain was cultured as n=6. The cell was lysed at an optical density of 0.6. Error bars represent mean values across replicates, and error bars indicate  $\pm$ SD. Ns represent no significant difference and \* ( $p \leq 0.05$ ). Acetyl-CoA (p-value of 0.0273), Succinyl-CoA (p-value of 0.0392), and Malonyl-CoA (p-value of 0.0653). Wild-type and PanC *E. coli* were cultured in LB broth at 37°C in a shaker. Following this, a 1:10 serial dilution of each *E. coli* strain was performed, and at an optical density of 0.6, cells were centrifuged at 6300rpm at 4 °C for 15 minutes to remove media. A 2 mL of a 40:40:20 ratio of ice-cold acetonitrile, methanol, and water was added to the cell pellet and flash-frozen in liquid nitrogen. Cell pellets were freeze-thawed three times. The extract was centrifuged at 6300rpm at 4 °C for 5 min. The supernatant was dried under vacuum using a centrifuge and stored at -80 °C for analysis. Samples were analyzed using an Atlantis™ T3 3 $\mu$ m particle reverse-phase capillary column. The mobile phase A comprised 100% water, supplemented with 8 mM ammonium acetate and 0.05% acetic acid. Mobile phase B was 100% ACN. The gradient used for separating CoAs: 5% B, 0 min; 5% B, 1 min; 70% B, 3 min; 70% B, 13 min; 5% B, 13.1 min; 5% B, 20 min

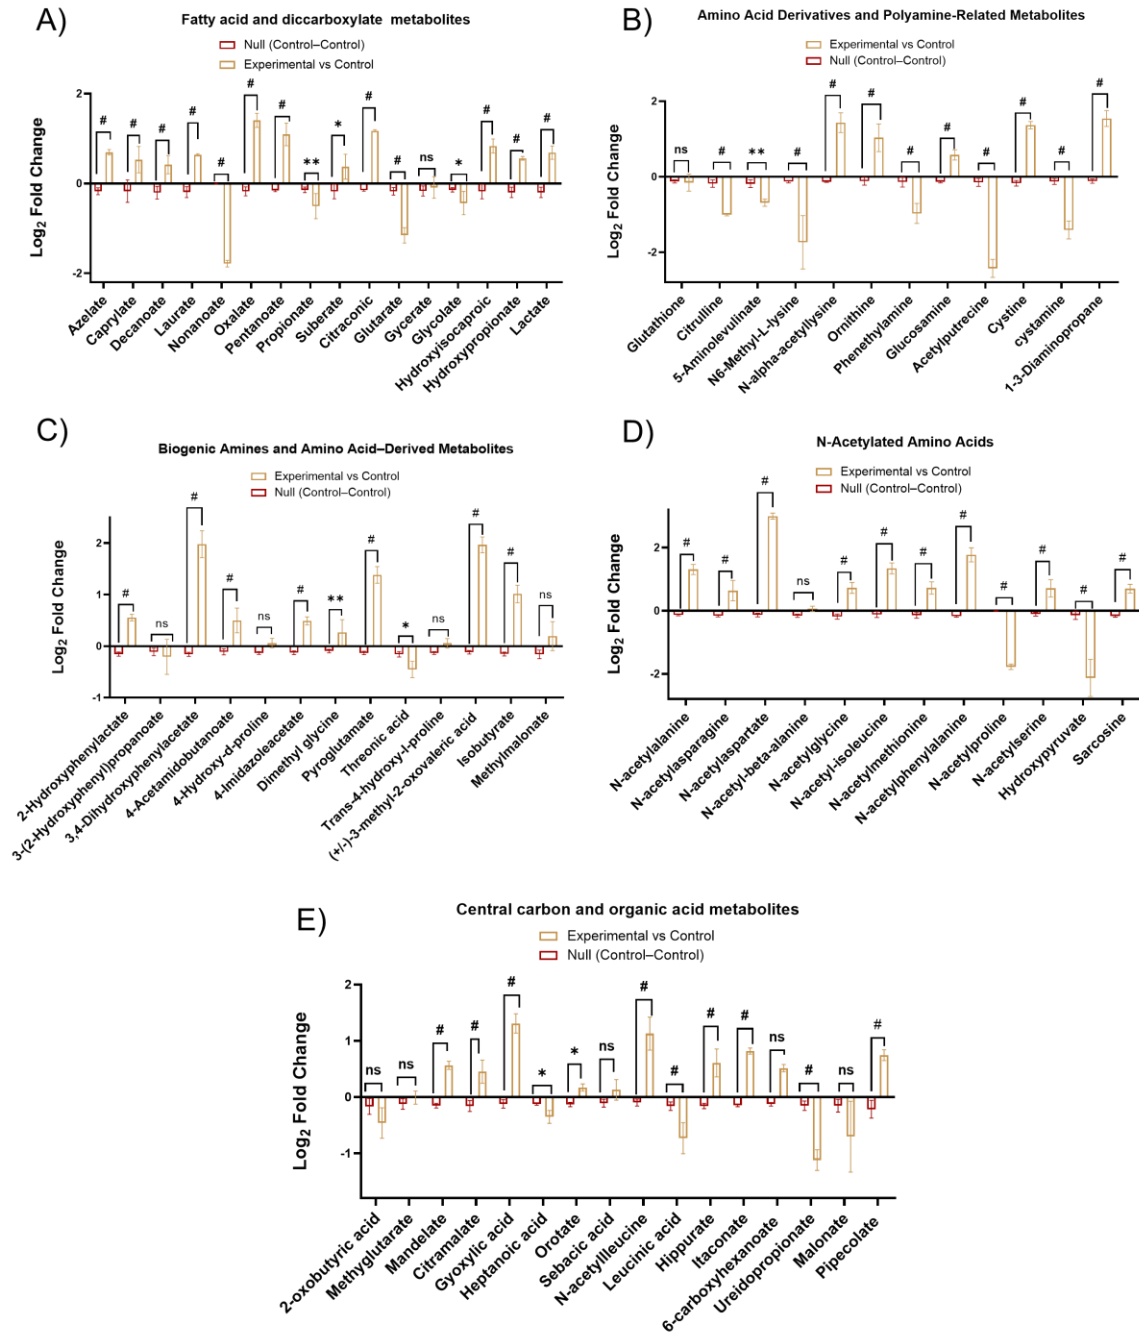

**Figure S8:** Log<sub>2</sub> fold change of metabolites relative to control compared with a control/control null distribution. Log<sub>2</sub> fold change (Log<sub>2</sub> FC) values for the null distribution were calculated by comparing control samples against other control replicates to estimate baseline variability under no biological change. Experimental Log<sub>2</sub> FC values were calculated relative to the control condition. Bars represent mean values across replicates, and error bars indicate  $\pm$ SD. The horizontal line at Log<sub>2</sub> FC = 0 denotes 1:1 and no change relative to control. Ns represent no significant difference, \* ( $p \leq 0.05$ ), \*\* ( $p \leq 0.01$ ), \*\*\* ( $p \leq 0.001$ ), # ( $p \leq 0.0001$ ).

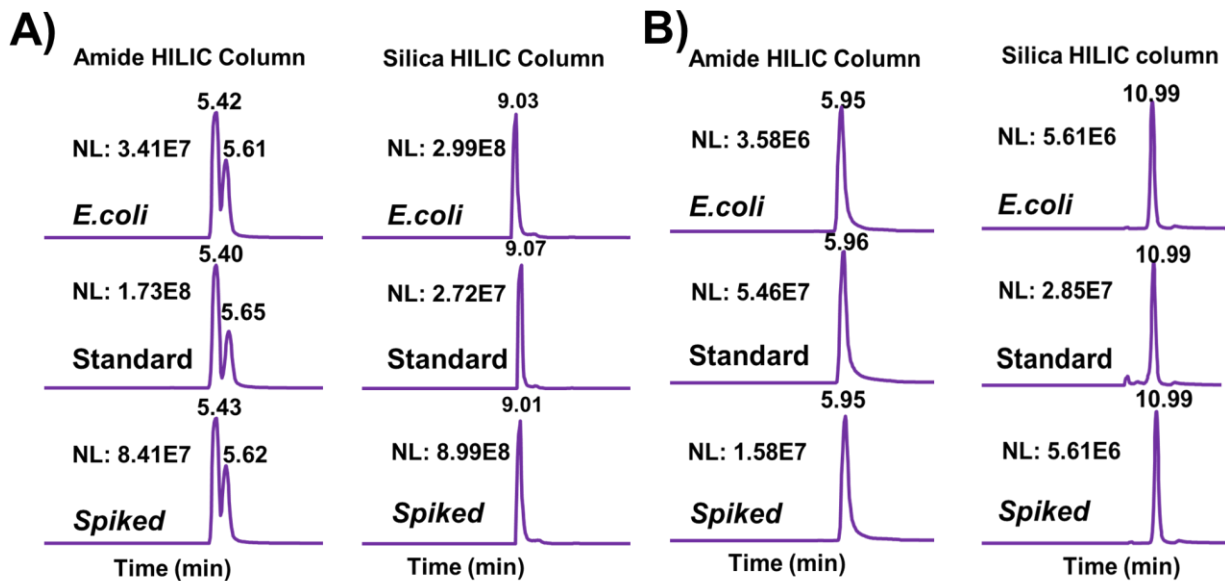

**Figure S9:** Level one confirmation of methionine sulfoxide and gamma-aminobutyric acid. (A) Retention time match of unlabeled methionine sulfoxide in *E. coli* lysate, standard, and spiked *E. coli* lysate. (B) Retention time match of unlabeled gamma-aminobutyric acid in *E. coli* lysate, standard, and spiked *E. coli* lysate

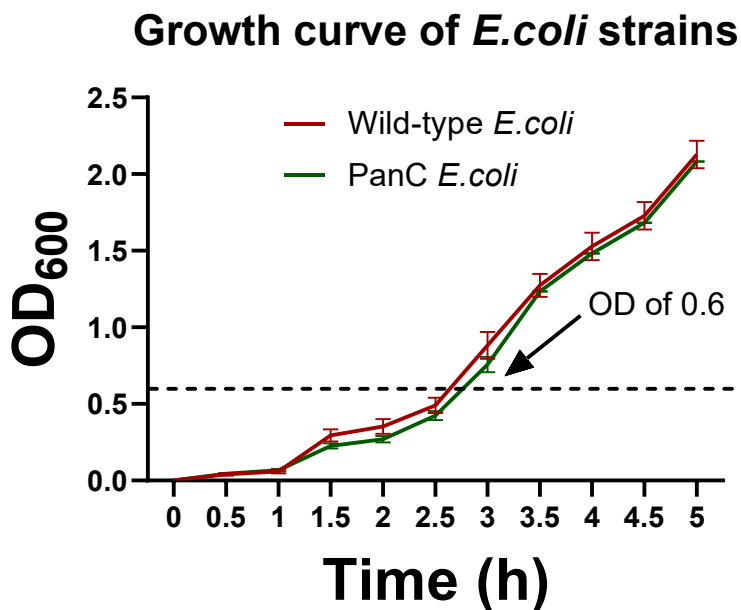

**Figure S10:** Growth curve of Wild-type and PanC *E. coli* using LB Broth. The optical density (OD) of the two strains was measured at timed intervals to determine the time at which the cells would be lysed. Subsequent culture growth was consistent with the predetermined growth curve. At an OD of 0.6, cells are lysed and metabolites extracted.

**Table 1:** Targeted analytes, linearity, retention time, relative standard deviation of standards

| Analyte                                      | R <sup>2</sup> (n=3) | RT (min) | RT RSD (n=3) % | Reaction RSD (n=3) % |
|----------------------------------------------|----------------------|----------|----------------|----------------------|
| (+/-)-3-methyl-2-oxovaleric acid sodium salt | 0.9981               | 10.71    | 0.18           | 4.62                 |
| 1,3_diaminopropane                           | 0.9976               | 12.26    | 0.05           | 3.45                 |
| 2-hydroxyphenylactate                        | 0.9934               | 11.67    | 0.26           | 3.75                 |
| 2-oxobutyric acid                            | 0.9951               | 10.01    | 0.12           | 2.61                 |
| 3-(2-Hydroxyphenyl) propanoate               | 0.9973               | 11.71    | 0.33           | 2.42                 |
| 3,4-dihydroxyphenylacetate                   | 0.9924               | 14.47    | 0.06           | 1.87                 |
| 4-acetamidobutanoate                         | 0.9927               | 11.43    | 0.23           | 3.52                 |
| 4-hydroxy-d-proline                          | 0.9998               | 10.22    | 0.25           | 3.49                 |
| 4-imidazoleacetate                           | 0.9932               | 13.67    | 0.18           | 3.13                 |
| 5-aminolevulinate                            | 0.9952               | 9.28     | 0.13           | 1.91                 |
| 6-carboxyhexanoate                           | 0.9935               | 9.02     | 0.11           | 1.51                 |
| Acetylputrecine                              | 1                    | 9.89     | 0.35           | 2.33                 |
| Alanine                                      | 0.9992               | 10.3     | 0.13           | 1.51                 |
| Alpha ketoisovalerate`                       | 0.9961               | 9.83     | 0.25           | 1.58                 |
| Alpha-ketopantoate                           | 1                    | 10.22    | 0.61           | 1.28                 |
| Arginine                                     | 0.9953               | 14.41    | 0.17           | 3.26                 |
| Asparagine                                   | 0.9965               | 9.83     | 0.19           | 2.17                 |
| Aspartic acid                                | 0.9931               | 9.85     | 0.21           | 1.92                 |
| Azelate                                      | 1                    | 10.39    | 0.18           | 1.48                 |
| Beta-alanine                                 | 0.9992               | 9.8      | 0.06           | 1.67                 |
| Caprylate                                    | 0.9971               | 9.5      | 0.18           | 2.59                 |
| Citraconic                                   | 1                    | 10.24    | 0.44           | 2.78                 |
| Citramalate                                  | 0.9953               | 10.42    | 0.16           | 1.89                 |

|                                |               |              |             |             |
|--------------------------------|---------------|--------------|-------------|-------------|
| <b>Citrate</b>                 | <b>0.9972</b> | <b>9.61</b>  | <b>0.55</b> | <b>3.57</b> |
| <b>Citrulline</b>              | <b>1</b>      | <b>9.7</b>   | <b>0.36</b> | <b>2.34</b> |
| <b>Cysteamine</b>              | <b>0.9927</b> | <b>9.82</b>  | <b>0.35</b> | <b>3.13</b> |
| <b>Cysteine</b>                | <b>0.9915</b> | <b>13.59</b> | <b>0.24</b> | <b>1.78</b> |
| <b>Cystine</b>                 | <b>0.9953</b> | <b>6.51</b>  | <b>0.15</b> | <b>3.81</b> |
| <b>Decanoate</b>               | <b>0.9982</b> | <b>9.33</b>  | <b>0.47</b> | <b>3.23</b> |
| <b>Dimethyl glycine</b>        | <b>0.9995</b> | <b>12.29</b> | <b>0.55</b> | <b>2.58</b> |
| <b>Fumarate</b>                | <b>0.9973</b> | <b>9.73</b>  | <b>0.26</b> | <b>3.33</b> |
| <b>Glucosamine</b>             | <b>1</b>      | <b>9.69</b>  | <b>0.11</b> | <b>2.78</b> |
| <b>Glutamic acid</b>           | <b>0.9956</b> | <b>10.87</b> | <b>0.26</b> | <b>2.56</b> |
| <b>Glutamine</b>               | <b>1</b>      | <b>10.19</b> | <b>0.08</b> | <b>1.68</b> |
| <b>Glutarate</b>               | <b>0.9967</b> | <b>10.32</b> | <b>0.25</b> | <b>3.44</b> |
| <b>Glutathione</b>             | <b>1</b>      | <b>10.22</b> | <b>0.15</b> | <b>3.4</b>  |
| <b>Glycerate</b>               | <b>0.9967</b> | <b>9.92</b>  | <b>0.59</b> | <b>3.21</b> |
| <b>Glycine</b>                 | <b>0.9977</b> | <b>10.24</b> | <b>2.3</b>  | <b>2.89</b> |
| <b>Glycolic acid</b>           | <b>0.9979</b> | <b>10.44</b> | <b>0.08</b> | <b>3.67</b> |
| <b>Glyoxylic acid</b>          | <b>0.9995</b> | <b>9.76</b>  | <b>0.18</b> | <b>2.37</b> |
| <b>Heptanoic acid</b>          | <b>0.9938</b> | <b>9.55</b>  | <b>0.13</b> | <b>1.86</b> |
| <b>Hippurate</b>               | <b>0.9919</b> | <b>8.29</b>  | <b>0.22</b> | <b>1.98</b> |
| <b>Histidine</b>               | <b>0.9998</b> | <b>11.07</b> | <b>0.15</b> | <b>3.41</b> |
| <b>Hydroxy isocaproic</b>      | <b>0.9947</b> | <b>9.52</b>  | <b>0.1</b>  | <b>2.52</b> |
| <b>Hydroxyl propionic acid</b> | <b>1</b>      | <b>10.41</b> | <b>0.03</b> | <b>1.75</b> |
| <b>Hydroxy pyruvate</b>        | <b>0.9965</b> | <b>10.47</b> | <b>0.2</b>  | <b>2.57</b> |
| <b>Isobuyrate</b>              | <b>1</b>      | <b>10.29</b> | <b>0.8</b>  | <b>3.89</b> |
| <b>Isoleucine</b>              | <b>0.9968</b> | <b>9.34</b>  | <b>0.1</b>  | <b>2.78</b> |
| <b>Itaconate</b>               | <b>0.9938</b> | <b>10.24</b> | <b>0.13</b> | <b>2.56</b> |
| <b>Lactate</b>                 | <b>1</b>      | <b>10.34</b> | <b>0.37</b> | <b>1.97</b> |
| <b>Laurate</b>                 | <b>0.9973</b> | <b>8.9</b>   | <b>0.05</b> | <b>2.57</b> |
| <b>Leucine</b>                 | <b>0.9993</b> | <b>9.76</b>  | <b>0.24</b> | <b>3.67</b> |
| <b>Leucinic acid</b>           | <b>1</b>      | <b>10.32</b> | <b>0.17</b> | <b>2.95</b> |
| <b>Lysine</b>                  | <b>0.9954</b> | <b>10.06</b> | <b>0.06</b> | <b>4.5</b>  |
| <b>Malate</b>                  | <b>1</b>      | <b>14.77</b> | <b>0.08</b> | <b>5.78</b> |
| <b>Malonate</b>                | <b>0.9959</b> | <b>10.47</b> | <b>0.13</b> | <b>2.58</b> |
| <b>Mandelate</b>               | <b>0.9992</b> | <b>9.77</b>  | <b>0.48</b> | <b>1.53</b> |

|                               |               |              |             |             |
|-------------------------------|---------------|--------------|-------------|-------------|
| <b>Methionine</b>             | <b>0.9944</b> | <b>9.82</b>  | <b>0.19</b> | <b>3.08</b> |
| <b>Methylglutarate</b>        | <b>0.9915</b> | <b>10.22</b> | <b>0.43</b> | <b>1.48</b> |
| <b>Methylmalonate</b>         | <b>0.9933</b> | <b>10</b>    | <b>0.1</b>  | <b>2.27</b> |
| <b>N6-methyl_L_lysine</b>     | <b>0.998</b>  | <b>10.32</b> | <b>0.38</b> | <b>2.73</b> |
| <b>N-acetyl alanine</b>       | <b>0.9935</b> | <b>12.24</b> | <b>0.11</b> | <b>2.46</b> |
| <b>N-acetyl asparagine</b>    | <b>0.9974</b> | <b>10.11</b> | <b>0.2</b>  | <b>2.96</b> |
| <b>N-acetyl aspartate</b>     | <b>1</b>      | <b>13.16</b> | <b>0.08</b> | <b>2.45</b> |
| <b>N-acetyl-beta-alanine</b>  | <b>0.9956</b> | <b>11.02</b> | <b>0.33</b> | <b>1.99</b> |
| <b>N-acetyl glycine</b>       | <b>1</b>      | <b>10.52</b> | <b>0.06</b> | <b>2.38</b> |
| <b>N-acetyl-isoleucine</b>    | <b>0.9953</b> | <b>12.91</b> | <b>0.05</b> | <b>2.57</b> |
| <b>N-acetyl leucine</b>       | <b>0.999</b>  | <b>11.27</b> | <b>0.11</b> | <b>1.87</b> |
| <b>N-acetylmethionine</b>     | <b>0.9976</b> | <b>9.79</b>  | <b>0.08</b> | <b>2.09</b> |
| <b>N-acetyl phenylalanine</b> | <b>0.9986</b> | <b>9.89</b>  | <b>0.38</b> | <b>2.58</b> |
| <b>N-acetyl proline</b>       | <b>1</b>      | <b>10.39</b> | <b>0.12</b> | <b>3.15</b> |
| <b>N-acetyl serine</b>        | <b>0.9953</b> | <b>11.43</b> | <b>0.15</b> | <b>3.47</b> |
| <b>N-alpha_acetyllysine</b>   | <b>0.9958</b> | <b>9.92</b>  | <b>0.45</b> | <b>2.5</b>  |
| <b>Nonanoate</b>              | <b>0.9891</b> | <b>9.4</b>   | <b>0.27</b> | <b>2.18</b> |
| <b>Ornithine</b>              | <b>0.9919</b> | <b>9.89</b>  | <b>0.09</b> | <b>1.84</b> |
| <b>Orotate</b>                | <b>0.9982</b> | <b>9.41</b>  | <b>0.21</b> | <b>3.39</b> |
| <b>Oxalate</b>                | <b>1</b>      | <b>12.26</b> | <b>0.26</b> | <b>2.24</b> |
| <b>Oxaloacetate</b>           | <b>0.9982</b> | <b>10.65</b> | <b>0.17</b> | <b>2.06</b> |
| <b>Pantoate</b>               | <b>1</b>      | <b>9.8</b>   | <b>0.19</b> | <b>3.17</b> |
| <b>Pantothenate</b>           | <b>0.9983</b> | <b>10.25</b> | <b>0.22</b> | <b>2.08</b> |
| <b>Pentanoate</b>             | <b>0.9963</b> | <b>10.32</b> | <b>0.16</b> | <b>1.97</b> |
| <b>Phenethylamine</b>         | <b>0.9928</b> | <b>7.86</b>  | <b>0.17</b> | <b>2.68</b> |
| <b>Phenylalanine</b>          | <b>1</b>      | <b>9.04</b>  | <b>0.14</b> | <b>2.97</b> |
| <b>Pipecolate</b>             | <b>0.9918</b> | <b>10.41</b> | <b>0.12</b> | <b>1.43</b> |
| <b>Proline</b>                | <b>1</b>      | <b>11.35</b> | <b>0.36</b> | <b>2.58</b> |
| <b>Propionate</b>             | <b>0.9975</b> | <b>10.49</b> | <b>0.46</b> | <b>1.79</b> |
| <b>Pyroglutamate</b>          | <b>0.9969</b> | <b>10.95</b> | <b>0.19</b> | <b>1.94</b> |
| <b>Pyruvate</b>               | <b>0.9957</b> | <b>10.37</b> | <b>0.27</b> | <b>2.45</b> |
| <b>Sarcosine</b>              | <b>0.9982</b> | <b>11.8</b>  | <b>0.22</b> | <b>3.21</b> |
| <b>Sebacic acid</b>           | <b>0.9949</b> | <b>8.93</b>  | <b>0.18</b> | <b>4.07</b> |
| <b>Serine</b>                 | <b>0.9925</b> | <b>9.25</b>  | <b>0.14</b> | <b>1.39</b> |

|                                  |                        |              |             |                      |
|----------------------------------|------------------------|--------------|-------------|----------------------|
| <b>Suberate</b>                  | <b>1</b>               | <b>9.52</b>  | <b>0.28</b> | <b>2.05</b>          |
| <b>Succinate</b>                 | <b>0.9982</b>          | <b>9.9</b>   | <b>0.19</b> | <b>3.45</b>          |
| <b>Threonic acid</b>             | <b>1</b>               | <b>15.66</b> | <b>0.21</b> | <b>2.78</b>          |
| <b>Threonine</b>                 | <b>0.9964</b>          | <b>9.86</b>  | <b>0.37</b> | <b>1.79</b>          |
| <b>Trans-4-hydroxy-l-proline</b> | <b>0.9954</b>          | <b>8.43</b>  | <b>0.23</b> | <b>1.76</b>          |
| <b>Tryptophan</b>                | <b>0.9991</b>          | <b>9.38</b>  | <b>0.17</b> | <b>3.51</b>          |
| <b>Tyrosine</b>                  | <b>0.9945</b>          | <b>9.03</b>  | <b>0.38</b> | <b>2.86</b>          |
| <b>Ureidopropionate</b>          | <b>0.9939</b>          | <b>10.28</b> | <b>0.39</b> | <b>1.76</b>          |
| <b>Valine</b>                    | <b>1</b>               | <b>10.02</b> | <b>0.45</b> | <b>2.02</b>          |
| <b>Average</b>                   | <b>0.9968 ± 0.0027</b> | <b>10.42</b> | <b>0.25</b> | <b>2.63 ± 0.8082</b> |

**Table 2:** Metabolites with HMDB IDs and fold change

| <b>Analyte</b>                               | <b>HMDB</b> | <b>Log2 Fold change (n=3)</b> |          |          |
|----------------------------------------------|-------------|-------------------------------|----------|----------|
|                                              |             | <b>1</b>                      | <b>2</b> | <b>3</b> |
| (+/-)-3-methyl-2-oxovaleric acid sodium salt | HMDB0000491 | 2.027593                      | 1.789169 | 2.076828 |
| 1,3_diaminopropane                           | HMDB0000002 | 1.508083                      | 1.76354  | 1.345414 |
| 2-hydroxyphenylactate                        | HMDB0000669 | 0.494886                      | 0.621172 | 0.544303 |
| 2-oxobutyric acid                            | HMDB0000005 | -0.404214                     | -0.23023 | -0.76142 |
| 3-(2-Hydroxyphenyl) propanoate               | HMDB0033752 | -0.31839                      | 0.17565  | -0.4791  |
| 3,4-dihydroxyphenylacetate                   | HMDB0001336 | 1.795222                      | 2.275815 | 1.861533 |
| 4-acetamidobutanoate                         | HMDB0003681 | 0.430834                      | 0.763963 | 0.296994 |
| 4-hydroxy-d-proline                          | HMDB0060460 | 0.138971                      | 0.075317 | -0.04248 |
| 4-imidazoleacetate                           | HMDB0002024 | 0.546028                      | 0.521676 | 0.39954  |
| 5-aminolevulinate                            | HMDB0001149 | -0.62236                      | -0.6473  | -0.7964  |
| 6-carboxyhexanoate                           | HMDB0000857 | 0.500486                      | 0.453355 | 0.580817 |
| Acetylputrecine                              | HMDB0002064 | -2.65381                      | -2.17719 | -2.45093 |
| Alanine                                      | HMDB0000161 | -1.2823                       | -1.60268 | -0.74072 |
| Alpha ketoisovalerate                        | HMDB0000019 | 0.692521                      | 0.509586 | 0.059026 |
| Alpha-ketopantoate                           | HMDB0304068 | 0.061308                      | 0.187535 | 0.051241 |
| Arginine                                     | HMDB0000517 | 1.397977                      | 1.551345 | 1.292265 |
| Asparagine                                   | HMDB0000168 | -0.76852                      | -1.3763  | -0.95658 |
| Aspartic acid                                | HMDB0000191 | -0.16048                      | -0.32657 | -0.23549 |
| Azelate                                      | HMDB0000784 | 0.635894                      | 0.753212 | 0.694047 |
| Beta-alanine                                 | HMDB0000056 | 0.931286                      | 0.893071 | 0.68083  |
| Caprylate                                    | HMDB0000482 | 0.412132                      | 0.313365 | 0.863817 |
| Citraconic                                   | HMDB0000634 | 1.163462                      | 1.15302  | 1.200071 |

|                         |             |          |          |           |
|-------------------------|-------------|----------|----------|-----------|
| Citramalate             | HMDB0000426 | 0.628595 | 0.224122 | 0.499124  |
| Citrate                 | HMDB0000094 | 0.615852 | 0.591759 | 0.375574  |
| Citrulline              | HMDB0000904 | -0.96504 | -1.02035 | -1.02668  |
| Cysteamine              | HMDB0250701 | -1.31056 | -1.68248 | -1.24177  |
| Cysteine                | HMDB0251515 | 1.415702 | 1.369356 | 1.264413  |
| Cystine                 | HMDB0000192 | 1.478332 | 1.306039 | 1.308777  |
| Decanoate               | HMDB0000511 | 0.240999 | 0.373297 | 0.638919  |
| Dimethyl glycine        | HMDB0000092 | 0.549215 | 0.167065 | 0.085578  |
| Fumarate                | HMDB0000134 | -0.20381 | -0.36995 | -0.487386 |
| Glucosamine             | HMDB0001514 | 0.428657 | 0.694288 | 0.613728  |
| Glutamic acid           | HMDB0000148 | 2.51654  | 2.227166 | 2.363606  |
| Glutamine               | HMDB0000641 | 1.413681 | 1.513485 | 1.448873  |
| Glutarate               | HMDB0000661 | -0.97334 | -1.31282 | -1.18039  |
| Glutathione             | HMDB0000125 | -0.4069  | -0.08876 | 0.031172  |
| Glycerate               | HMDB0000139 | -0.27229 | -0.17843 | 0.182331  |
| Glycine                 | HMDB0000123 | -0.46108 | -0.88901 | 0.053441  |
| Glycolic acid           | HMDB0000115 | -0.61075 | -0.56207 | -0.13672  |
| Glyoxylic acid          | HMDB0000119 | 1.204004 | 1.506333 | 1.212586  |
| Heptanoic acid          | HMDB0000666 | -0.30269 | -0.48636 | -0.2768   |
| Hippurate               | HMDB0000714 | 0.591843 | 0.363429 | 0.858754  |
| Histidine               | HMDB0000177 | 2.442213 | 2.737674 | 2.21475   |
| Hydroxy isocaproic      | HMDB0000746 | 0.979427 | 0.85347  | 0.667027  |
| Hydroxyl propionic acid | HMDB0000700 | 0.548082 | 0.524097 | 0.604182  |
| Hydroxy pyruvate        | HMDB0001352 | -2.30693 | -1.47566 | -2.61239  |
| Isobutyrate             | HMDB0001873 | 0.903262 | 0.925054 | 1.20914   |
| Isoleucine              | HMDB0000172 | -1.1744  | -1.6913  | -1.32208  |
| Itaconate               | HMDB0002092 | 0.858427 | 0.753392 | 0.836536  |
| Lactate                 | HMDB0000190 | 0.60313  | 0.857047 | 0.597099  |
| Laurate                 | HMDB0000638 | 0.663145 | 0.633212 | 0.612412  |
| Leucine                 | HMDB0000687 | -0.66009 | -1.33215 | -0.93321  |
| Leucinic acid           | HMDB0000665 | -0.85613 | -0.92866 | -0.41588  |

|                        |             |          |          |          |
|------------------------|-------------|----------|----------|----------|
| Lysine                 | HMDB0000182 | 0.50297  | 0.353946 | 0.057205 |
| Malate                 | HMDB0000156 | -0.49478 | -0.75073 | -0.65344 |
| Malonate               | HMDB0000691 | -0.28047 | -1.43016 | -0.40662 |
| Mandelate              | HMDB0000703 | 0.49757  | 0.639278 | 0.547313 |
| Methionine             | HMDB0000696 | 1.011912 | 1.16984  | 0.766716 |
| Methylglutarate        | HMDB0000752 | 0.043314 | 0.068682 | -0.14515 |
| Methylmalonate         | HMDB0000202 | 0.422608 | -0.12009 | 0.280477 |
| N6-methyl_L_lysine     | HMDB0002038 | -1.93378 | -0.95225 | -2.32483 |
| N-acetyl alanine       | HMDB0000766 | 1.388861 | 1.407228 | 1.123128 |
| N-acetyl asparagine    | HMDB0006028 | 0.843058 | 0.261877 | 0.796764 |
| N-acetyl aspartate     | HMDB0000812 | 2.886989 | 3.028711 | 3.069507 |
| N-acetyl-beta-alanine  | HMDB0061880 | 0.131721 | 0.073198 | -0.03156 |
| N-acetyl glycine       | HMDB0000532 | 0.906773 | 0.563773 | 0.695071 |
| N-acetyl-isoleucine    | HMDB0061684 | 1.190309 | 1.300058 | 1.530755 |
| N-acetyl leucine       | HMDB0011756 | 1.459115 | 1.007873 | 0.910437 |
| N-acetylmethionine     | HMDB0011745 | 0.825802 | 0.496408 | 0.837791 |
| N-acetyl phenylalanine | HMDB0000512 | 2.026182 | 1.679616 | 1.606752 |
| N-acetyl proline       | HMDB0094701 | -1.68571 | -1.86178 | -1.78471 |
| N-acetyl serine        | HMDB0002931 | 0.409905 | 0.772297 | 0.947796 |
| N-alpha_acetyllysine   | HMDB0000446 | 1.315469 | 1.249071 | 1.729039 |
| Nonanoate              | HMDB0000847 | -1.70332 | -1.829   | -1.83244 |
| Ornithine              | HMDB0000214 | 1.453618 | 0.79141  | 0.850795 |
| Orotate                | HMDB0000226 | 0.146812 | 0.240677 | 0.117872 |
| Oxalate                | HMDB0002329 | 1.301893 | 1.329961 | 1.58582  |
| Oxaloacetate           | HMDB0000223 | 1.732596 | 1.20649  | 1.093424 |
| Pantoic acid           | HMDB0240389 | 2.315777 | 1.395684 | 1.528525 |
| Pantothenate           | HMDB0000210 | 1.56007  | 1.763134 | 1.428973 |
| Pentanoate             | HMDB0000892 | 1.244044 | 1.233708 | 0.799521 |
| Phenethylamine         | HMDB0012275 | -0.75972 | -1.26999 | -0.89077 |
| Phenylalanine          | HMDB0000159 | -1.02947 | -0.99361 | -1.34837 |
| Pipecolate             | HMDB0000070 | 0.849634 | 0.708988 | 0.667795 |

|                           |             |          |          |          |
|---------------------------|-------------|----------|----------|----------|
| Proline                   | HMDB0000162 | 2.325456 | 2.345727 | 2.346504 |
| Propionate                | HMDB0000237 | -0.7068  | -0.18717 | -0.62831 |
| Pyroglutamate             | HMDB0000267 | 1.462421 | 1.195168 | 1.486451 |
| Pyruvate                  | HMDB0000243 | 1.58582  | 1.300846 | 1.337192 |
| Sarcosine                 | HMDB0000271 | 0.847683 | 0.664808 | 0.576155 |
| Sebacic acid              | HMDB0000792 | 0.013407 | 0.337548 | 0.028664 |
| Serine                    | HMDB0000187 | 0.049489 | 0.049836 | 0.064559 |
| Suberate                  | HMDB0000893 | 0.10999  | 0.663591 | 0.345964 |
| Succinate                 | HMDB0000254 | 0.435715 | 0.831707 | 0.285045 |
| Threonic acid             | HMDB0000943 | -0.4014  | -0.3272  | -0.63251 |
| Threonine                 | HMDB0000167 | 0.636414 | 0.658178 | 0.402117 |
| Trans-4-hydroxy-l-proline | HMDB0000725 | 0.136241 | 0.075641 | -0.04501 |
| Tryptophan                | HMDB0000929 | 0.248047 | -0.09437 | -0.08867 |
| Tyrosine                  | HMDB0250803 | -0.40468 | 0.035555 | -0.30754 |
| Ureidopropionate          | HMDB0000026 | -0.94252 | -1.31149 | -1.11568 |
| Valine                    | HMDB0000883 | -1.48092 | -1.76706 | -1.97091 |

**Table 3:** Ratio of reporter ions to cyclized products of tagged analyte

| <b>Analyte</b>                               | <b>Ratio of single to double fragmentation</b> |                     |
|----------------------------------------------|------------------------------------------------|---------------------|
|                                              | <b>Cyclized product</b>                        | <b>Reporter ion</b> |
| (+/-)-3-methyl-2-oxovaleric acid sodium salt | 1                                              | 3.4                 |
| 1,3_diaminopropane                           | 1                                              | 4                   |
| 2-hydroxyphenylactate                        | 1                                              | 3.5                 |
| 2-oxobutyric acid                            | 1                                              | 4.3                 |
| 3-(2-Hydroxyphenyl) propanoate               | 1                                              | 2.9                 |
| 3,4-dihydroxyphenylacetate                   | 1                                              | 3.7                 |
| 4-acetamidobutanoate                         | 1                                              | 4.3                 |
| 4-hydroxy-d-proline                          | 1                                              | 2.8                 |
| 4-imidazoleacetate                           | 1                                              | 4.3                 |
| 5-aminolevulinate                            | 1                                              | 4                   |
| 6-carboxyhexanoate                           | 1                                              | 3                   |
| Acetylputrecine                              | 1                                              | 3.3                 |
| Alanine                                      | 1                                              | 3.6                 |
| Alpha ketoisovalerate                        | 1                                              | 3.2                 |
| Alpha-ketopantoate                           | 1                                              | 3.7                 |
| Arginine                                     | 1                                              | 3.1                 |
| Asparagine                                   | 1                                              | 2.9                 |
| Aspartic acid                                | 1                                              | 3.4                 |
| Azelate                                      | 1                                              | 4.5                 |
| Beta-alanine                                 | 1                                              | 3.5                 |
| Caprylate                                    | 1                                              | 3.8                 |
| Citraconic                                   | 1                                              | 3.3                 |
| Citramalate                                  | 1                                              | 3.1                 |
| Citrate                                      | 1                                              | 3.6                 |
| Citrulline                                   | 1                                              | 2.9                 |
| Cysteamine                                   | 1                                              | 2.8                 |

|                         |   |     |
|-------------------------|---|-----|
| Cysteine                | 1 | 3.4 |
| Cystine                 | 1 | 3.1 |
| Decanoate               | 1 | 4   |
| Dimethyl glycine        | 1 | 4.2 |
| Fumarate                | 1 | 3.9 |
| Glucosamine             | 1 | 3.7 |
| Glutamic acid           | 1 | 3.5 |
| Glutamine               | 1 | 3.8 |
| Glutarate               | 1 | 2.9 |
| Glutathione             | 1 | 3.3 |
| Glycerate               | 1 | 3.1 |
| Glycine                 | 1 | 3.5 |
| Glycolic acid           | 1 | 4.1 |
| Glyoxylic acid          | 1 | 3.3 |
| Heptanoic acid          | 1 | 3.7 |
| Hippurate               | 1 | 4.2 |
| Histidine               | 1 | 4.4 |
| Hydroxy isocaproic      | 1 | 3.5 |
| Hydroxyl propionic acid | 1 | 3.3 |
| Hydroxy pyruvate        | 1 | 3.9 |
| Isobutyrate             | 1 | 3.6 |
| Isoleucine              | 1 | 3.2 |
| Itaconate               | 1 | 3.7 |
| Lactate                 | 1 | 4.2 |
| Laurate                 | 1 | 3.3 |
| Leucine                 | 1 | 2.8 |
| Leucinic acid           | 1 | 3.7 |
| Lysine                  | 1 | 3.5 |
| Malate                  | 1 | 3.9 |
| Malonate                | 1 | 3.3 |
| Mandelate               | 1 | 4.2 |
| Methionine              | 1 | 3.5 |
| Methylglutarate         | 1 | 4.3 |
| Methylmalonate          | 1 | 2.9 |

|                        |   |     |
|------------------------|---|-----|
| N6-methyl_L_lysine     | 1 | 3.8 |
| N-acetyl alanine       | 1 | 3.6 |
| N-acetyl asparagine    | 1 | 4   |
| N-acetyl aspartate     | 1 | 3.3 |
| N-acetyl-beta-alanine  | 1 | 3.5 |
| N-acetyl glycine       | 1 | 3.7 |
| N-acetyl-isoleucine    | 1 | 2.9 |
| N-acetyl leucine       | 1 | 3.7 |
| N-acetylmethionine     | 1 | 3   |
| N-acetyl phenylalanine | 1 | 3.6 |
| N-acetyl proline       | 1 | 3.8 |
| N-acetyl serine        | 1 | 3.3 |
| N-alpha_acetyllysine   | 1 | 3.5 |
| Nonanoate              | 1 | 4.2 |
| Ornithine              | 1 | 3.2 |
| Orotate                | 1 | 2.7 |
| Oxalate                | 1 | 3.1 |
| Oxaloacetate           | 1 | 3.8 |
| Pantoic acid           | 1 | 4.2 |
| Pantothenate           | 1 | 3.3 |
| Pentanoate             | 1 | 3.6 |
| Phenethylamine         | 1 | 2.9 |
| Phenylalanine          | 1 | 4.1 |
| Pipecolate             | 1 | 3.1 |
| Proline                | 1 | 3.5 |
| Propionate             | 1 | 3.8 |
| Pyroglutamate          | 1 | 3.3 |
| Pyruvate               | 1 | 4.1 |
| Sarcosine              | 1 | 3.1 |
| Sebacic acid           | 1 | 3.6 |
| Serine                 | 1 | 3.3 |
| Suberate               | 1 | 4.4 |
| Succinate              | 1 | 4.2 |
| Threonic acid          | 1 | 3.7 |

|                           |   |     |
|---------------------------|---|-----|
| Threonine                 | 1 | 3.1 |
| Trans-4-hydroxy-L-proline | 1 | 3.8 |
| Tryptophan                | 1 | 4.3 |
| Tyrosine                  | 1 | 2.8 |
| Ureidopropionate          | 1 | 3.6 |
| Valine                    | 1 | 3.3 |
